# Supplementary material
Source: publisher site journal article supplement (https://www.dovepress.com/article/386509)
Supplement: Supplementary file 1 [file get_supplementary_file.php]

**Supplementary Table S1** The parameters of the conventional MRI sequence

| **Sequence** | **TR**  **(ms)** | **TE**  **(ms)** | **FOV**  **(cm×cm)** | **Slice thickness**  **(mm)** | **Slice gap(mm)** | **NEX** | **Matrix** |
| --- | --- | --- | --- | --- | --- | --- | --- |
| AX-T1W1 | 650 | 6.7 | 22×22 | 5.0 | 1.0 | 1 | 288×258 |
| AX-T2W1 | 4679 | 108.9 | 22×22 | 5.0 | 1.0 | 1 | 384×256 |
| AX-FLAIR | 8000 | 147.4 | 22×22 | 5.0 | 1.0 | 1 | 256×224 |
| OAx-DWI | 3000 | minimum | 22×22 | 5.0 | 0.5 | 2 | 128×128 |

**Notes:** TR, repetition time; TE, echo Time; FOV, field of view; NEX, number of excitations; AX, axial view; T1WI, T1 weighted image; T2WI, T2 weighted image; FLAIR, fluid attenuated inversion recovery; DWI, diffusion Weighted Imaging.

**Supplementary material 1** The detailed preprocessing steps of the pseudocontinuous arterial spin labeling (PCASL) data are as follows:

During 3D PCASL sequence scanning, we selected the cerebral blood flow (CBF) automatic generation option. The generated CBF data can be used directly for data processing. After the scan, we had all control label pairs, including 36 control images ,36 label images, and 36 automatically generated CBF images. The CBF images were used for data processing. First, we checked the imaging quality; second, we used dcm2nii software (https://people.cas.sc.edu/rorden/mricron/index.html) to convert the DICOM format image files into NIFTI images; next, we used the “Realign: Estimate & Write” function to estimate the head motion on SPM8, and excluded individuals whose head motion exceeded 2mm or/and 1°.

After realignment of head motion, The preprocessing steps of CBF data are as follows:(1) Spatial standardization: the ‘‘Normalize: Estimate & Write” function in SPM8 was used to carry out nonlinear transformation of CBF images of each participant into MNI space and registration with the positron emission tomography (PET) perfusion template in SPM8, and resample the images to 2 mm×2 mm× 2 mm. (2)Normalization: the CBF value per voxel was divided by the mean value of the whole brain by ‘‘Mean Division” in ‘‘Standardization” in DPABI software (http://rfmri.org/dpabi). (3) Smoothing: data were spatially smoothed with a 6 mm×6 mm× 6 mm full-width at half-maximum (FWHM) Gaussian kernel to improve the signal-to-noise ratio.

We have checked image quality Strictly after each step of data preprocessing.
